# Supplementary material for: 20(S)-Ginsenoside Rg3 is a novel inhibitor of autophagy and sensitizes hepatocellular carcinoma to doxorubicin
Source: PubMed Central journal article supplement (PMC4147336; doi:10.18632/oncotarget.2034), 2014-05-28
Supplement: oncotarget-05-4438-s001.pdf [file oncotarget-05-4438-s001.pdf]

## 20(S)-Ginsenoside Rg<sub>3</sub> is a Novel Inhibitor of Autophagy and Sensitizes Hepatocellular Carcinoma to Doxorubicin

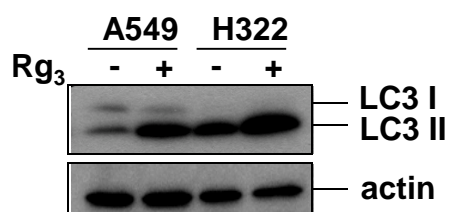

**Supplemental Figure S1: Rg<sub>3</sub>-induced LC3 II accumulation in lung cancer cell lines.** A549 and H322 cells were treated with 100 μM Rg<sub>3</sub> for 12 h and cell lysates were analyzed by western blot.

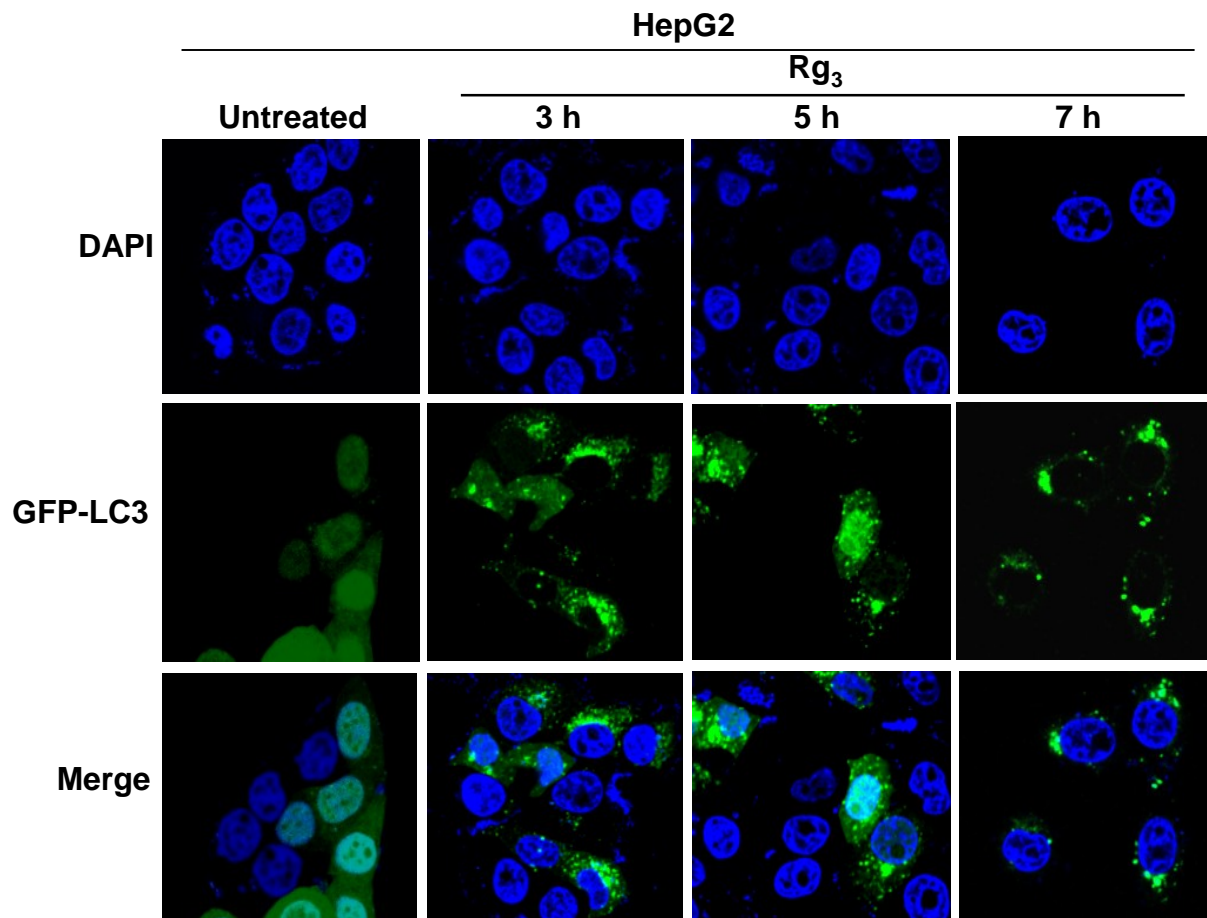

**Supplemental Figure S2: Rg<sub>3</sub> treatment markedly increases GFP-LC3 puncta formation.** HepG2 cells with transient expression of GFP-LC3 were treated with 100  $\mu$ M Rg<sub>3</sub> for the indicated time points and cells were stained with DAPI. GFP-LC3 punctation /aggregation was observed under a confocal microscope.

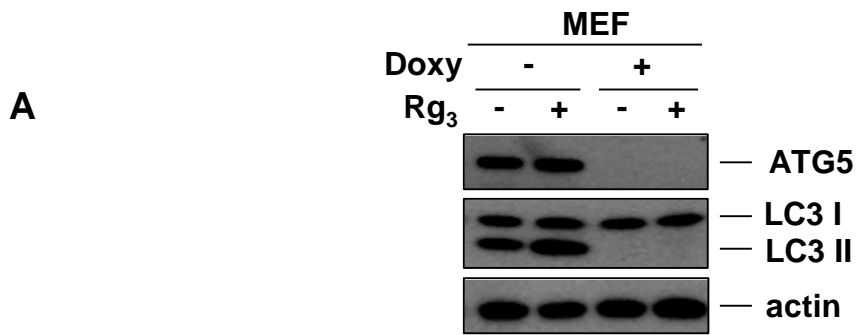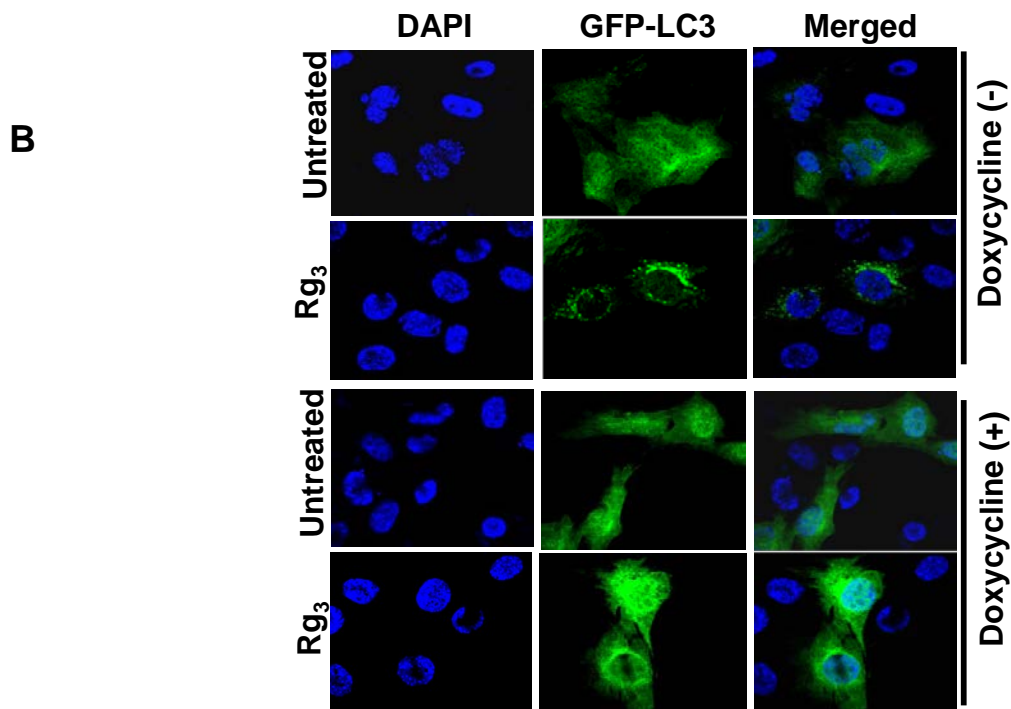

**Supplemental Figure S3: A Rg<sub>3</sub>-induced LC3 II accumulation is ATG5-dependent.**

**A.** Tet-off Atg5 MEFs with stable expression of GFP-LC3 were pretreated with or without doxycycline for 4 days, then cells were treated with 100  $\mu$ M Rg<sub>3</sub> for 12 h, and cell lysate was subjected to western blotting.

**B.** Tet-off Atg5 MEFs were prepared as described in (A), and treated with 100  $\mu$ M Rg<sub>3</sub> for 3 h. Cells were examined with a confocal microscope for GFP-LC3 punctuation/aggregation.

**A**

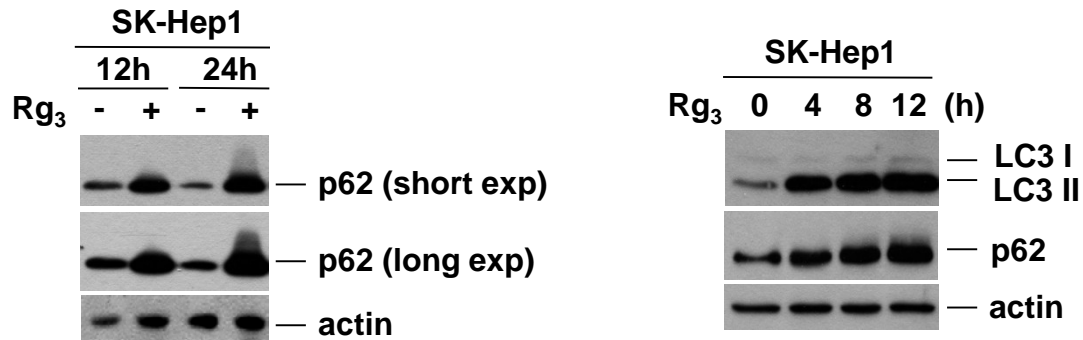

**B**

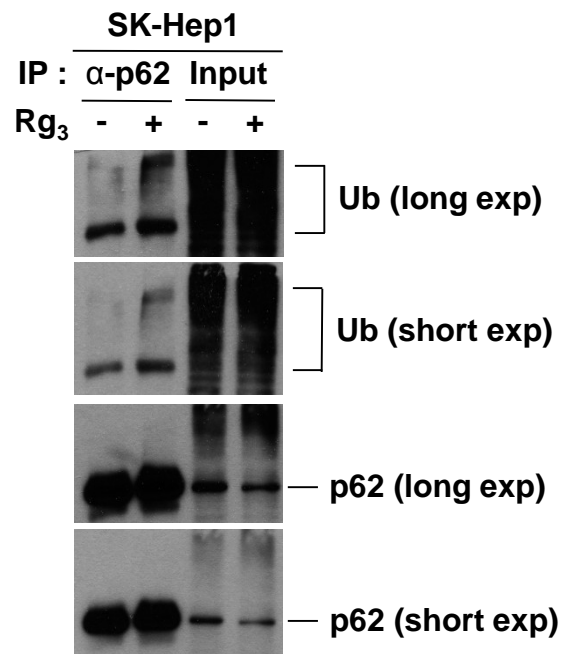

**Supplemental Figure S4: Rg<sub>3</sub>-inhibits p62 degradation in HCC cell lines.**

SK-Hep1 cells were treated with 100 μM Rg<sub>3</sub> for the indicated times (A) or overnight (B) and cell lysates were analyzed by western blot (A) or immunoprecipitated with an anti-p62 antibody (B) and then analyzed by western blot with a ubiquitin antibody. Smearing in the Rg<sub>3</sub>-treated lanes (A) suggests accumulation of ubiquitinated p62, which is confirmed by the ubiquitin western upon immunoprecipitation of p62 (B).

**A**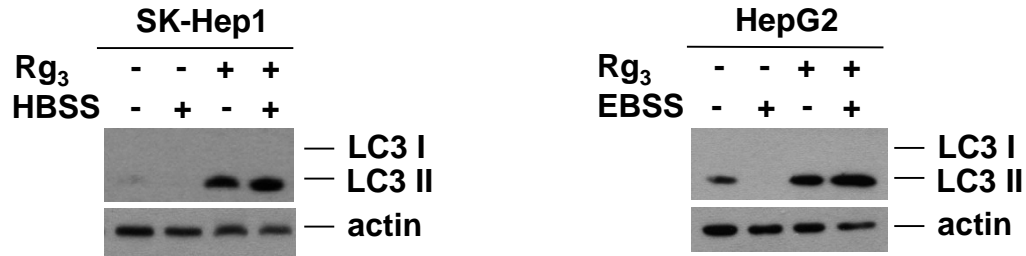**B**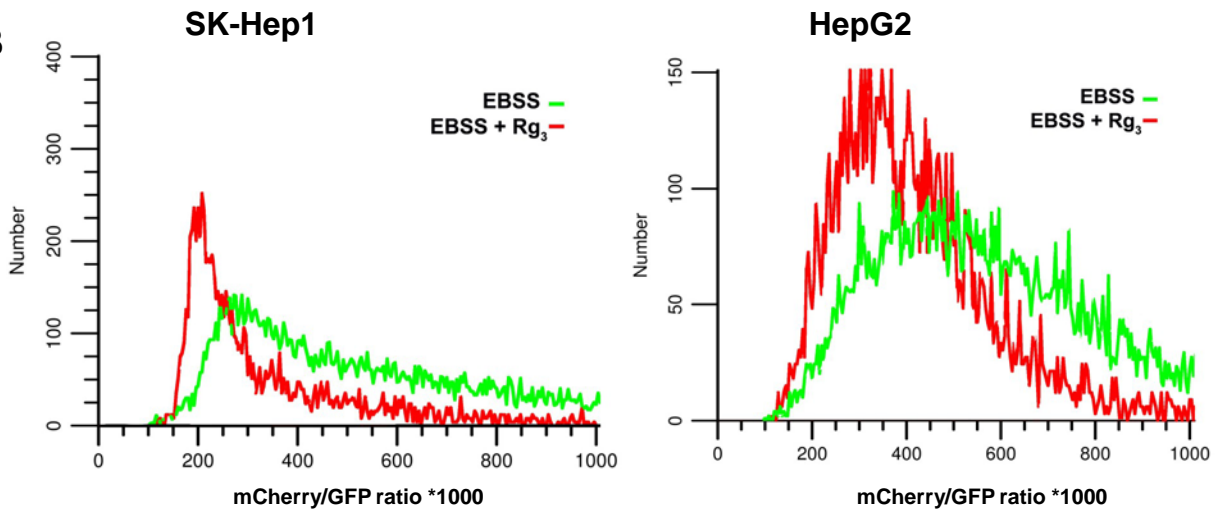

**Supplemental Figure S5: Rg<sub>3</sub> inhibits starvation induced autophagy in HCC cell lines.** (A) SK-Hep1 cells or HepG2 cells were pretreated with 100  $\mu$ M Rg<sub>3</sub> for 1h and then treated with HBSS or EBSS for 4 hours and lysates analyzed by western blotting. (B) SK-Hep1 cells or HepG2 cells stably expressing tandem mCherry-EGFP-LC3 were pretreated with 100  $\mu$ M Rg<sub>3</sub> for 1h and then treated overnight with EBSS and the Red/Green fluorescence ratio of the cells was analyzed by flow cytometry.

**A**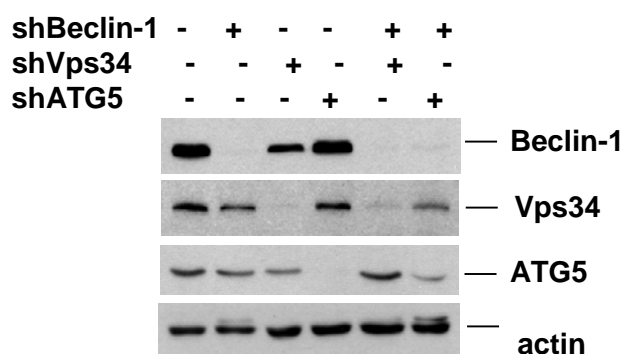**B**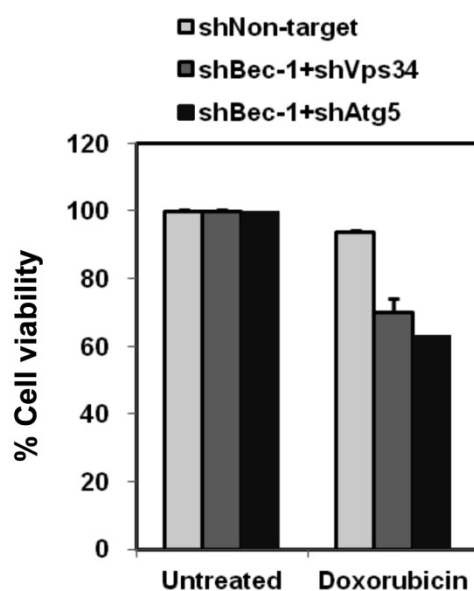

**Supplemental Figure S6: Autophagy has a pro-survival role in doxorubicin-induced cell death.**

**A.** Knock-down of autophagy-related genes. HepG2 cells were infected with a combination of lentivirus encoding Beclin-1, ATG5, or Vps34 shRNAs, or combinations thereof. After selection with puromycin (2  $\mu\text{g}/\text{mL}$ ), lysates were examined for knockdown by western blotting.

**B.** Suppression of autophagy by knock-down of Beclin-1/Atg5 or Beclin-1/Vps34 significantly enhances doxorubicin-induced cell death. Cells from (A) were treated with doxorubicin (2.5  $\mu\text{M}$ ) for 16 h and cell viability was analyzed by MTT assay. Results are averages  $\pm$  SEM.

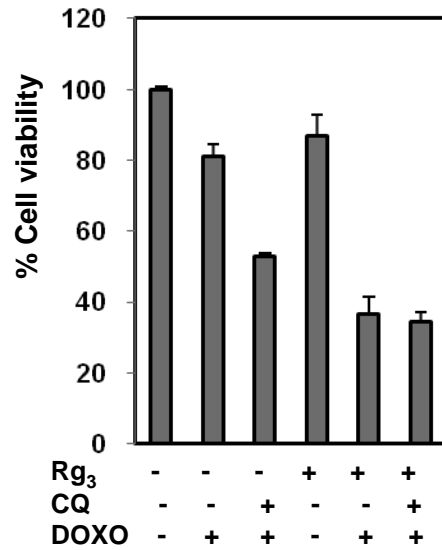

**Supplemental Figure S7: Rg<sub>3</sub> can sensitize to Doxorubicin-induced cell death in a manner similar to chloroquine.** The viability (MTT assay) of HepG2 cells was measured when pretreated with CQ (10  $\mu$ M) or/and Rg<sub>3</sub> (100  $\mu$ M) for 30 min, followed by doxorubicin (2.5  $\mu$ M) for 18 h. Results are averages  $\pm$  SEM.

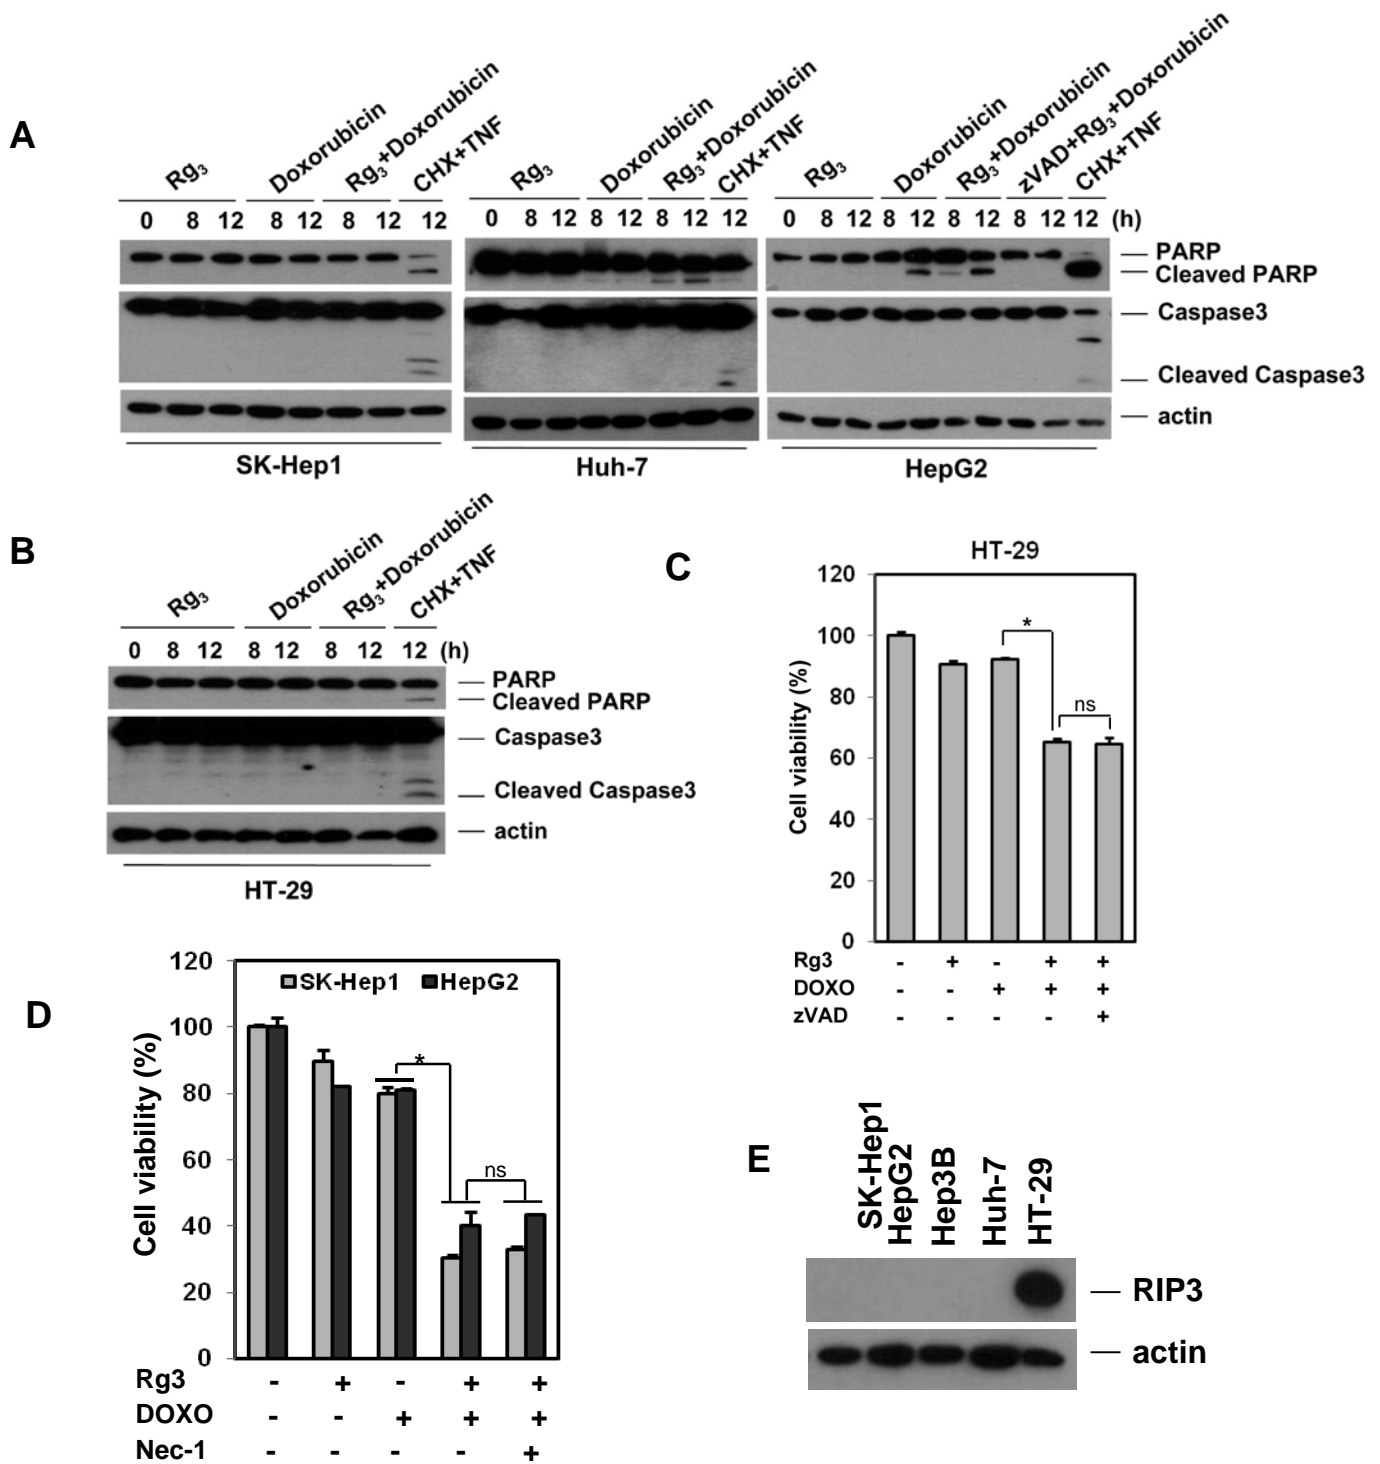

**Supplemental Figure S8: Rg<sub>3</sub> and doxorubicin induced-cell death is caspase-independent in HCC cell lines.** (A,B) SK-Hep1, Huh-7 or HepG2 cells (A), or HT-29 cells (B), were treated with Rg<sub>3</sub> (100 μM), doxorubicin (2.5 μM), or Rg<sub>3</sub> + doxorubicin for indicated time periods and or were treated with GST-TRAIL (25 ng/mL) for 12 h and cell lysates were subjected to western blotting for PARP cleavage and cleavage of caspase-3. (C) HT-29 cells were treated with Rg<sub>3</sub> (100 μM), doxorubicin (2.5 μM), or the combination Rg<sub>3</sub> + doxorubicin with or without zVAD (20 μM) for 18 h and cell viability was analyzed by MTT assay. Results are averages ± SEM. \* p<0.001. (D) SK-Hep1 or HepG2 cells were treated with Rg<sub>3</sub> (100 μM), doxorubicin (2.5 μM), or the combination Rg<sub>3</sub> + doxorubicin with or without necrostatin (40 μM) for 18 h and cell viability was analyzed by MTT assay. Results are averages ± SEM. \* p<0.001. (E) HCC cell lysates were probed by western blotting for RIP3 expression.



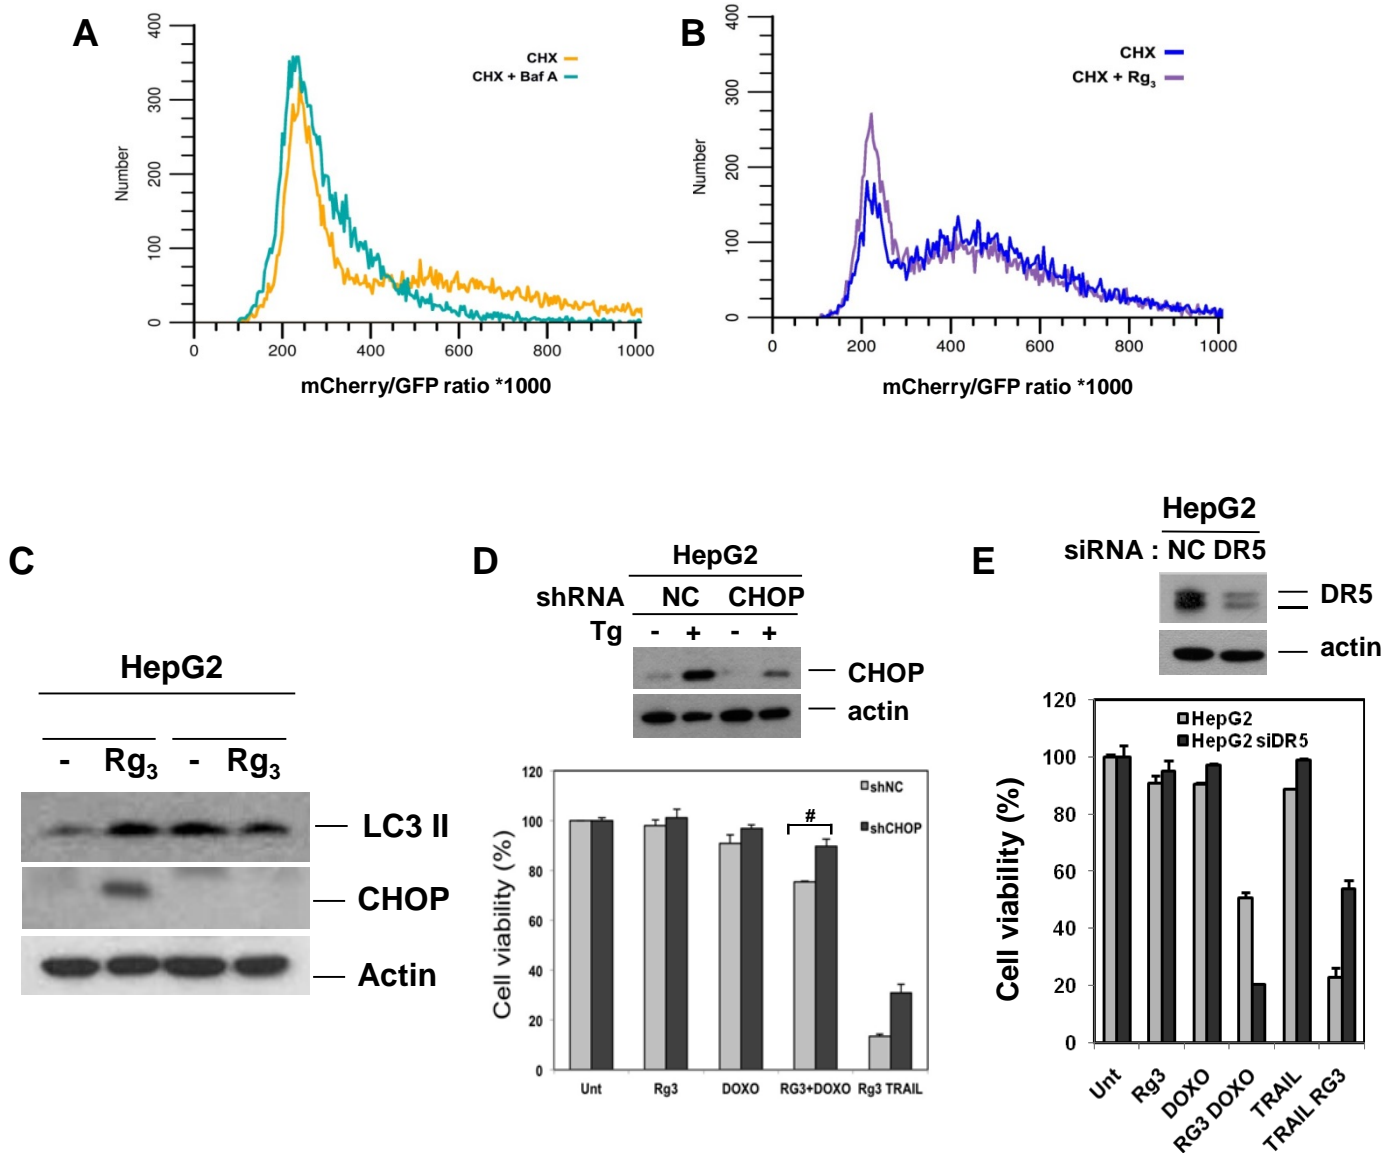

**Supplemental Figure S9: Rg<sub>3</sub> suppression of autophagy may require induction of CHOP.** (A,B) SK-Hep1 cells stably expressing tandem mCherry-EGFP-LC3 were pretreated with 5  $\mu$ M cycloheximide for 1h and then some cells were treated overnight with (A) 10nM BafA or (B) Rg<sub>3</sub> (100  $\mu$ M) and the red/green fluorescence ratio of the cells was analyzed by flow cytometry. (C) HepG2 cells expressing a CHOP shRNA hairpin or nonsilencing control were treated with Rg<sub>3</sub> (100  $\mu$ M) overnight and lysates were analyzed by western blotting. (D) HepG2 cells expressing a CHOP shRNA hairpin or nonsilencing control were treated with Rg<sub>3</sub> (100  $\mu$ M), doxorubicin (2.5  $\mu$ M), the combination Rg<sub>3</sub> + doxorubicin, or or GST-TRAIL (25 ng/mL) for 12 h and analyzed by MTT assay. The Results are averages  $\pm$  SEM. # p= 0.013. To show knockdown efficiency, some CHOP knockdown cells were treated with thapsigargin (1  $\mu$ g/mL) for 12 h to induce CHOP expression. (E) HepG2 transfected with DR5 siRNA(48 hrs) were treated with Rg<sub>3</sub> (100  $\mu$ M), doxorubicin (2.5  $\mu$ M), or the combination Rg<sub>3</sub> + doxorubicin or TRAIL (25 ng/mL), or Rg<sub>3</sub> plus TRAIL for 16~18 h and viability was analyzed by MTT assay.

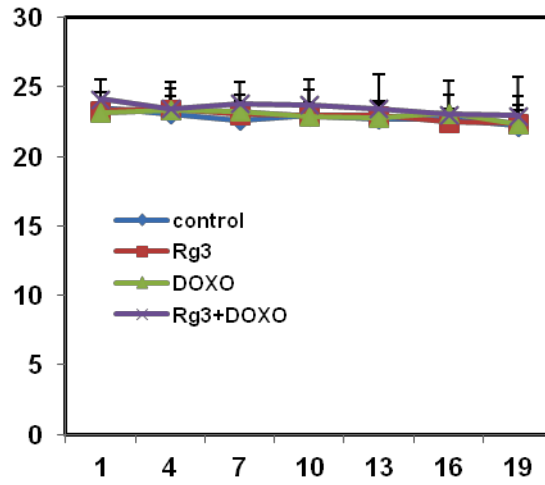

**Supplemental Figure S10: Effect of Rg<sub>3</sub> plus doxorubicin on Huh-7 hepatocellular carcinoma cell xenograft in athymic BALB/c nude mice.** Huh-7 tumors were established subcutaneously and treated with Rg<sub>3</sub>, doxorubicin or Rg<sub>3</sub> plus doxorubicin for 19 days. Body weight was monitored.
